# Supplementary material for: Insights Into the Evolution of the prdm1/Blimp1 Gene Family in Teleost Fish
Source: Front Immunol. 2020 Oct 30;11:596975. doi: 10.3389/fimmu.2020.596975 (PMC7662092; doi:10.3389/fimmu.2020.596975)
Supplement: Supplementary file 2 [file Table_1.xlsx]

## Sheet: Supplementary Table S1
Position in tree	Name assigned to group	Name assigned in salmonids	Organism name	Species	ACC Protein	GeneID	Symbol	Aliases	description	other designations	Chromosome	genomic nucleotide accession.version	start position on the genomic accession	end position on the genomic accession	orientation	exon count
1	blimp1a		Falco peregrinus	PEREGRINE FALCON	XP_005244097.2	101913461	PRDM1		PR/SET domain 1	PR domain zinc finger protein 1	Un
2			Falco cherrug	SAKER FALCON	XP_005445786.3	102046683	PRDM1		PR/SET domain 1	LOW QUALITY PROTEIN: PR domain zinc finger protein 1	Un
3			Taeniopygia guttata	ZEBRA FINCH	XP_012428162.2	100219562	PRDM1		PR/SET domain 1	PR domain zinc finger protein 1	3	NC_044214.1	43950213	43974908	plus	8
4			Corvus brachyrhynchos	AMERICAN CROW	XP_017595125.1	103619242	PRDM1	N302_02732	PR/SET domain 1	PR domain zinc finger protein 1	Un
5			Aquila chrysaetos	GOLDEN EAGLE	XP_029899112.1	115353595	PRDM1		PR/SET domain 1	PR domain zinc finger protein 1	2	NC_044005.1	61940351	62041408	minus	13
6			Haliaeetus leucocephalus	BALD EAGLE	XP_010571691.1	104835411	PRDM1		PR/SET domain 1	PR domain zinc finger protein 1	Un
7			Nipponia nippon	CRESTED IBIS	XP_009461597.1	104011113	PRDM1	Y956_01672	PR/SET domain 1	PR domain zinc finger protein 1	Un
8			Coturnix japonica	JAPANESE QUAIL	XP_015714258.1	107311886	PRDM1		PR/SET domain 1	PR domain zinc finger protein 1	3	NC_029518.1	62136501	62235768	minus	12
9			Gallus gallus	CHICKEN	XP_025004827.1	445340	PRDM1	Blimp-1	PR/SET domain 1	PR domain zinc finger protein 1|B-lymphocyte-induced maturation protein 1|PR domain 1|PR domain containing 1, with ZNF domain	3	NC_006090.5	68347905	68446168	minus	18
10			Meleagris gallopavo	TURKEY	XP_019468617.1	100548130	PRDM1		PR/SET domain 1	LOW QUALITY PROTEIN: PR domain zinc finger protein 1|PR domain containing 1, with ZNF domain|PR domain zinc finger protein 1	2	NC_015012.2	66689763	67380359	minus	7
11			Dromaius novaehollandiae	EMU	XP_025975769.1	112995169	PRDM1		PR/SET domain 1	PR domain zinc finger protein 1	Un
12			Struthio camelus australis	SOUTH AFRICAN OSTRICH	XP_009675213.1	104145415	PRDM1	N308_08563	PR/SET domain 1	LOW QUALITY PROTEIN: PR domain zinc finger protein 1|PR domain zinc finger protein 1	Un
13			Apteryx rowi	OKARITO BROWN KIWI	XP_025921504.1	112966052	PRDM1		PR/SET domain 1	PR domain zinc finger protein 1	Un
14			Anas platyrhynchos	DUCK	XP_027310569.1	101797804	PRDM1	Anapl_18074	PR/SET domain 1	PR domain zinc finger protein 1	3	NC_040048.1	71942535	72054820	minus	16
15			Alligator mississippiensis	AMERICAN ALLIGATOR	XP_006260422.1	102575041	PRDM1	Y1Q_0017772	PR/SET domain 1	PR domain zinc finger protein 1|PR domain-containing 1, with ZNF domain	Un
16			Alligator sinensis	CHINESE ALLIGATOR	XP_025054521.1	102385340	PRDM1		PR/SET domain 1	PR domain zinc finger protein 1	Un
17			Crocodylus porosus	AUSTRALIAN SALTWATER CROCODILE	XP_019393366.1	109311904	PRDM1		PR/SET domain 1	PR domain zinc finger protein 1	Un
18			Pelodiscus sinensis	CHINESE SOFT-SHELLED TURTLE	XP_006118522.1	102454613	PRDM1		PR/SET domain 1	PR domain zinc finger protein 1	Un
18			Gavialis gangeticus	GHARIAL	XP_019375695.1	109299639	PRDM1		PR/SET domain 1	PR domain zinc finger protein 1	Un
19			Chelonia mydas	GREEN SEA TURTLE	XP_007067071.1	102942193	PRDM1	UY3_13903	PR/SET domain 1	PR domain zinc finger protein 1	Un
20			Chrysemys picta	PAINTED TURTLE	XP_023958254.1	101951201	PRDM1		PR/SET domain 1	PR domain zinc finger protein 1	Un
21			Terrapene carolina triunguis	THREE-TOED BOX TURTLE	XP_024054702.1	112105923	PRDM1		PR/SET domain 1	PR domain zinc finger protein 1	Un
22			Gekko japonicus	GEKKO	XP_015271048.1	107114125	PRDM1		PR/SET domain 1	PR domain zinc finger protein 1	Un
23			Anolis carolinensis	GREEN ANOLE	XP_008118908.1	100560171	prdm1		PR/SET domain 1	PR domain zinc finger protein 1|PR domain containing 1, with ZNF domain	1	NC_014776.1	189058253	189167868	plus	10
24			Pogona vitticeps	BEARDED DRAGON	XP_020635090.1	110071754	PRDM1		PR/SET domain 1	PR domain zinc finger protein 1	Un
25			Podarcis muralis	COMMON WALL LIZARD	XP_028578903.1	114593998	PRDM1		PR/SET domain 1	PR domain zinc finger protein 1	3	NC_041314.1	49838619	49924741	plus	14
26			Python bivittatus	PYTHON	XP_007433539.1	103066062	PRDM1		PR/SET domain 1	PR domain zinc finger protein 1|PR domain containing 1, with ZNF domain	Un
27			Thamnophis sirtalis	GARTER SNAKE	XP_013919305.1	106546859	LOC106546859		PR domain zinc finger protein 1-like	PR domain zinc finger protein 1-like	Un
28			Notechis scutatus	TIGER SNAKE	XP_026522403.1	113411516	PRDM1		PR/SET domain 1	PR domain zinc finger protein 1	Un
29			Pseudonaja textilis	BROWN SNAKE	XP_026582451.1	113455354	PRDM1		PR/SET domain 1	PR domain zinc finger protein 1	Un
30			Ornithorhynchus anatinus	PLATYPUS	XP_001505433.2	100073811	PRDM1		PR/SET domain 1	PR domain zinc finger protein 1|PR domain containing 1, with ZNF domain	19	NC_041746.1	33703687	33816060	plus	9
31			Monodelphis domestica	GRAY SHORT-TAILED OPOSSUM	XP_016286707.1	100619194	PRDM1		PR/SET domain 1	PR domain zinc finger protein 1|PR domain containing 1, with ZNF domain	2	NC_008802.1	370550591	370641968	plus	16
32			Homo sapiens	HUMAN	NP_001189.2	639	PRDM1	BLIMP1, PRDI-BF1	PR/SET domain 1	PR domain zinc finger protein 1|B-lymphocyte-induced maturation protein 1|BLIMP-1|PR domain 1|PR domain containing 1, with ZNF domain|PRDI-binding factor-1|beta-interferon gene positive-regulatory domain I binding factor	6	NC_000006.12	106046729	106109938	plus	11
33			Mus musculus	MOUSE	NP_031574.2	12142	Prdm1	Blimp-1, Blimp1, PRDI-BF1, ZNFPR1A1, b2b1765Clo	PR domain containing 1, with ZNF domain	PR domain zinc finger protein 1|B lymphocyte induced maturation protein|B lymphocyte-induced maturation protein 1|PR domain-containing protein 1|beta-interferon gene positive regulatory domain I-binding factor	10	NC_000076.6	44437174	44528558	minus	12
34			Mus caroli	RYUKYU MOUSE	XP_021030560.1	110303706	Prdm1		PR/SET domain 1	PR domain zinc finger protein 1	10	NC_034579.1	39984865	40006381	minus	8
35			Microcaecilia unicolor	MICROCAECILIA UNICOLOR	XP_030051522.1	115465259	PRDM1		PR/SET domain 1	PR domain zinc finger protein 1	3	NC_044033.1	522569841	522619476	plus	7
36			Rhinatrema bivittatum	TWO-LINED CAECILIAN	XP_029451196.1	115087781	PRDM1		PR/SET domain 1	PR domain zinc finger protein 1	3	NC_042617.1	329729249	329763761	minus	7
37			Nanorana parkeri	NANORANA PARKERI	XP_018409045.1	108784674	PRDM1		PR/SET domain 1	PR domain zinc finger protein 1	Un
38			Xenopus tropicalis	TROPICAL CLAWED FROG	XP_002937203.1	493207	prdm1	blimp1, prdi-bf1, xblimp1	PR domain 1	PR domain zinc finger protein 1|PR domain containing 1, with ZNF domain	5	NC_030681.1	77124249	77141257	minus	9
39			Xenopus laevis	AFRICAN CLAWED FROG	XP_018118841.1	108716852	prdm1.L	XELAEV_18027228mg, blimp1, xblimp1	PR domain 1 L homeolog	PR domain zinc finger protein 1-like|PR domain containing 1, with ZNF domain L homeolog	5L	NC_030732.1	80849590	80866471	minus	9
40			Latimeria chalumnae	COELACANTH	XP_005997943.1	102348659	PRDM1		PR/SET domain 1	PR domain zinc finger protein 1	Un
41			Rhincodon typus	WHALE SHARK	XP_020389392.1	109935116	prdm1		PR/SET domain 1	PR domain zinc finger protein 1	Un
42			Callorhinchus milii	ELEPHANT SHARK	XP_007897304.1	103182205	prdm1		PR/SET domain 1	PR domain zinc finger protein 1|PR domain zinc finger protein 1-like protein	Un	NW_006890119.1	1713450	1782562	minus	15
43			Erpetoichthys calabaricus	REEDFISH	XP_028653483.1	114648557	prdm1		PR/SET domain 1	PR domain zinc finger protein 1	3	NC_041396.1	198776745	198804295	plus	8
44			Lepisosteus oculatus	SPOTTED GAR	XP_006626019.1	102687063	prdm1		PR/SET domain 1	PR domain zinc finger protein 1	LG1	NC_023179.1	38110809	38148017	minus	10
45			Scleropages formosus	ASIAN BONYTONGUE	XP_018598998.1	108929131	LOC108929131		PR domain zinc finger protein 1-like	PR domain zinc finger protein 1-like	1	NC_041806.1	38493124	38508425	minus	10
46			Scleropages formosus	ASIAN BONYTONGUE	XP_018612385.1	108937124	prdm1		PR/SET domain 1	PR domain zinc finger protein 1	8	NC_041813.1	21031494	21050007	minus	8
47			Paramormyrops kingsleyae	PARAMORMYROPS KINGSLEYAE	XP_023662027.1	111840905	prdm1		PR/SET domain 1	PR domain zinc finger protein 1	Un
48			Ictalurus punctatus	CHANNEL CATFISH	XP_017351189.1	108280572	prdm1		PR/SET domain 1	PR domain zinc finger protein 1	20	NC_030435.1	3024527	3035880	minus	8
49			Danio rerio	ZEBRAFISH	NP_955809.2	323473	prdm1a	Blimp-1, Blimp1, nrd, prdm1, ubo, wu:fb99c12, zgc:91885	PR domain containing 1a, with ZNF domain	PR domain zinc finger protein 1|B lymphocyte-induced maturation protein 1|PR domain containing 1, with ZNF domain|PR domain-containing 1|U boot|narrowminded|u-boot	16	NC_007127.7	7430998	7443372	minus	7
50			Oryzias latipes	JAPANESE MEDAKA	NP_001265815.1	101164431	prdm1	prdm1a	PR/SET domain 1	PR domain zinc finger protein 1	16	NC_019874.2	26685891	26698346	minus	7
51			Poecilia mexicana	POECILIA MEXICANA	XP_014846841.1	106920380	LOC106920380		PR domain zinc finger protein 1-like	PR domain zinc finger protein 1-like	Un
52			Oreochromis niloticus	NILE TILAPIA	XP_005455220.1	100706221	prdm1		PR/SET domain 1	PR domain zinc finger protein 1|PR domain containing 1, with ZNF domain	LG11	NC_031976.2	30796593	30821279	minus	8
53			Seriola lalandi dorsalis	KINGFISH	XP_023281241.1	111669209	prdm1		PR/SET domain 1	PR domain zinc finger protein 1	Un
54			Larimichthys crocea	LARGE YELLOW CROAKER	XP_027142957.1	104930172	prdm1	EH28_06856	PR/SET domain 1	PR domain zinc finger protein 1	XIII	NC_040023.1	36244921	36258238	minus	7
55			Takifugu rubripes	FUGU	XP_029694031.1	446070	prdm1		PR/SET domain 1	PR domain zinc finger protein 1|B lymphocyte induced maturation protein 1	7	NC_042291.1	5307567	5319315	minus	7
56			Esox lucius	NORTHERN PIKE	XP_010883607.1	105019264	prdm1		PR/SET domain 1	PR domain zinc finger protein 1	LG20	NC_025987.4	30279729	30296553	minus	9
57		blimp1a-1	Salvelinus alpinus	ARCTIC CHAR	XP_023835680.1	111958659	LOC111958659		PR domain zinc finger protein 1-like	PR domain zinc finger protein 1-like	LG35	NC_036874.1	6816989	6828846	minus	7
58			Oncorhynchus mykiss	RAINBOW TROUT	XP_021449439.1	110514303	LOC110514303		PR domain zinc finger protein 1-like	PR domain zinc finger protein 1-like	3	NC_035079.1	26086965	26104101	minus	8
59			Salmo salar	ATLANTIC SALMON	XP_014017319.1	106580605	LOC106580605		PR domain zinc finger protein 1-like	PR domain zinc finger protein 1-like	ssa02	NC_027301.1	22778208	22791644	minus	6
60			Salmo trutta	RIVER TROUT	XP_029593000.1	115176816	LOC115176816		PR domain zinc finger protein 1-like	PR domain zinc finger protein 1-like	37	NC_042993.1	20925506	20943542	minus	8
61		blimp1a-2	Oncorhynchus mykiss	RAINBOW TROUT	XP_021414575.1	110486999	LOC110486999		PR domain zinc finger protein 1-like	PR domain zinc finger protein 1-like	2	NC_035078.1	16473063	16490152	minus	8
62			Salvelinus alpinus	ARCTIC CHAR	XP_023844829.1	111965077	LOC111965077		PR domain zinc finger protein 1	PR domain zinc finger protein 1	LG6.1	NC_036845.1	11071197	11087463	minus	8
63			Salmo salar	ATLANTIC SALMON	XP_014056343.1	106605348	prdm1		PR/SET domain 1	PR domain zinc finger protein 1	ssa05	NC_027304.1	57733493	57749796	plus	8
64			Salmo trutta	RIVER TROUT	XP_029596518.1	115179277	LOC115179277		PR domain zinc finger protein 1-like	PR domain zinc finger protein 1-like	3	NC_042959.1	54934158	54950473	plus	8
65	blimp1c		Danio rerio	ZEBRAFISH	XP_017208061.1	100150534	prdm1c		PR domain containing 1c, with ZNF domain	PR domain zinc finger protein 1	20	NC_007131.7	48067829	48086736	plus	7
66			Oryzias latipes	JAPANESE MEDAKA	NP_001265739.1	101173518	prdm1b		PR domain zinc finger protein 1-like	uncharacterized protein LOC101173518	24	NC_019882.2	6970267	6976978	plus	7
67			Poecilia mexicana	POECILIA MEXICANA	XP_014847321.1	106920679	LOC106920679		PR domain zinc finger protein 1-like	PR domain zinc finger protein 1-like	Un
68			Oreochromis niloticus	NILE TILAPIA	XP_005463283.1	109194164	LOC109194164		PR domain zinc finger protein 1	PR domain zinc finger protein 1	LG15	NC_031980.2	12792819	12801673	minus	7
69			Larimichthys crocea	LARGE YELLOW CROAKER	XP_010739331.2	104927042	LOC104927042	EH28_16104	PR domain zinc finger protein 1	PR domain zinc finger protein 1	XI	NC_040021.1	8103774	8112486	plus	8
70			Seriola lalandi dorsalis	KINGFISH	XP_023270624.1	111661339	LOC111661339		PR domain zinc finger protein 1-like	PR domain zinc finger protein 1-like	Un
71			Takifugu rubripes	FUGU	XP_003971943.3	101074732	LOC101074732		PR domain zinc finger protein 1-like	PR domain zinc finger protein 1-like	16	NC_042300.1	11627834	11635135	plus	7
72			Esox lucius	NORTHERN PIKE	XP_010887800.1	105021685	LOC105021685		PR domain zinc finger protein 1	PR domain zinc finger protein 1	LG14	NC_025981.4	5195685	5210806	plus	8
73		blimp1c-1	Salvelinus alpinus	ARCTIC CHAR	XP_023829471.1	111954178	LOC111954178		PR domain zinc finger protein 1-like	PR domain zinc finger protein 1-like	LG28	NC_036868.1	2259457	2274957	minus	6
74			Oncorhynchus mykiss	RAINBOW TROUT	XP_021466990.1	110529181	LOC110529181		PR domain zinc finger protein 1-like	PR domain zinc finger protein 1-like	8	NC_035084.1	8351212	8362688	minus	6
75			Salmo salar	ATLANTIC SALMON	XP_013999369.1	106571156	LOC106571156		PR domain zinc finger protein 1-like	PR domain zinc finger protein 1-like	ssa15	NC_027314.1	22312043	22338705	minus	7
76			Salmo trutta	RIVER TROUT	XP_029590081.1	115175062	LOC115175062		PR domain zinc finger protein 1-like	PR domain zinc finger protein 1-like	35	NC_042991.1	31053160	31071501	plus	7
77		blimp1c-2	Salmo salar	ATLANTIC SALMON	XP_014060069.1	106607555	LOC106607555		PR domain zinc finger protein 1-like	PR domain zinc finger protein 1-like	ssa06	NC_027305.1	45267033	45280062	minus	7
78			Salmo trutta	RIVER TROUT	XP_029611473.1	115195588	LOC115195588		PR domain zinc finger protein 1-like	PR domain zinc finger protein 1-like	1	NC_042957.1	38553885	38566540	minus	7
79			Oncorhynchus mykiss	RAINBOW TROUT	XP_021455719.1	110522002	LOC110522002		PR domain zinc finger protein 1-like	PR domain zinc finger protein 1-like	4	NC_035080.1	49630029	49646489	minus	7
80			Salvelinus alpinus	ARCTIC CHAR	XP_023855379.1	111972595	LOC111972595		PR domain zinc finger protein 1-like	PR domain zinc finger protein 1-like	LG14	NC_036854.1	7631778	7647035	minus	7
81	blimp1b		Mus musculus	MOUSE	I7HJS4	100503878	Zfp683	Gm13060, Hobit	zinc finger protein 683	novel zinc finger protein	4	NC_000070.6	134051195	134058941	plus	0
82			Mus caroli	RYUKYU MOUSE	XP_021017097.2	110293564	Znf683		zinc finger protein 683	tissue-resident T-cell transcription regulator protein ZNF683	4	NC_034573.1	123686639	123710635	plus	7
83			Homo sapiens	HUMAN	XP_016856443.1	257101	ZNF683	Hobit	zinc finger protein 683	tissue-resident T-cell transcription regulator protein ZNF683|homolog of Blimp-1 in T cells|homolog of Blimp-1 in T-cell|hypothetical protein MGC33414	1	NC_000001.11	26361632	26374536	minus	10
84			Monodelphis domestica	GRAY SHORT-TAILED OPOSSUM	XP_007491427.1	103099322	ZNF683		zinc finger protein 683	zinc finger protein 683	4	NC_008804.1	363754700	363766067	minus	7
85			Ornithorhynchus anatinus	PLATYPUS	XP_028936984.1	114817394	ZNF683		zinc finger protein 683	tissue-resident T-cell transcription regulator protein ZNF683	16	NC_041743.1	44356260	44361864	minus	6
86			Aquila chrysaetos	GOLDEN EAGLE	XP_011582613.1	105406133	ZNF683		zinc finger protein 683	zinc finger protein 683	Un
87			Haliaeetus leucocephalus	BALD EAGLE	XP_010574663.1	104837316	LOC104837316		adult enhancer factor 1-like	adult enhancer factor 1-like	Un
88			Falco cherrug	SAKER FALCON	XP_027669735.1	102058407	ZNF683		zinc finger protein 683	tissue-resident T-cell transcription regulator protein ZNF683	Un
89			Nipponia nippon	CRESTED IBIS	XP_009469188.1	104017838	ZNF683		zinc finger protein 683	zinc finger protein 683	Un
90			Microcaecilia unicolor	MICROCAECILIA UNICOLOR	XP_030075864.1	115481019	ZNF683		zinc finger protein 683	tissue-resident T-cell transcription regulator protein ZNF683	11	NC_044041.1	194897422	194921120	plus	6
91			Rhinatrema bivittatum	TWO-LINED CAECILIAN	XP_029474946.1	115100568	ZNF683		zinc finger protein 683	tissue-resident T-cell transcription regulator protein ZNF683	11	NC_042625.1	88997220	89025777	plus	7
92			Alligator mississippiensis	AMERICAN ALLIGATOR	XP_019350431.1	109284972	ZNF683	Y1Q_0023549	zinc finger protein 683	tissue-resident T-cell transcription regulator protein ZNF683	Un
93			Alligator sinensis	CHINESE ALLIGATOR	XP_006019867.1	102381121	ZNF683		zinc finger protein 683	tissue-resident T-cell transcription regulator protein ZNF683	Un
94			Gavialis gangeticus	GHARIAL	XP_019367625.1	109293929	ZNF683		zinc finger protein 683	tissue-resident T-cell transcription regulator protein ZNF683	Un
95			Chelonia mydas	GREEN SEA TURTLE	XP_027682964.1	102932078	ZNF683	UY3_11753	zinc finger protein 683	tissue-resident T-cell transcription regulator protein ZNF683|PR domain zinc finger protein 1	Un
96			Chrysemys picta	PAINTED TURTLE	XP_023963396.1	101945208	ZNF683		zinc finger protein 683	tissue-resident T-cell transcription regulator protein ZNF683	Un
97			Terrapene carolina triunguis	THREE-TOED BOX TURTLE	XP_024059384.1	112109207	ZNF683		zinc finger protein 683	tissue-resident T-cell transcription regulator protein ZNF683	Un
98			Podarcis muralis	COMMON WALL LIZARD	XP_028594593.1	114601529	ZNF683		zinc finger protein 683	tissue-resident T-cell transcription regulator protein ZNF683	8	NC_041319.1	26763188	26777428	minus	7
99			Pogona vitticeps	BEARDED DRAGON	XP_020662564.1	110086151	ZNF683		zinc finger protein 683	tissue-resident T-cell transcription regulator protein ZNF683	Un
100			Thamnophis sirtalis	GARTER SNAKE	XP_013919578.1	106547068	ZNF683		zinc finger protein 683	zinc finger protein 683	Un
101			Notechis scutatus	TIGER SNAKE	XP_026531833.1	113417589	ZNF683		zinc finger protein 683	tissue-resident T-cell transcription regulator protein ZNF683	Un
102			Pseudonaja textilis	BROWN SNAKE	XP_026558628.1	113437715	ZNF683		zinc finger protein 683	tissue-resident T-cell transcription regulator protein ZNF683	Un
103			Rhincodon typus	WHALE SHARK	XP_020367181.1	109912207	LOC109912207		PR domain zinc finger protein 1-like	PR domain zinc finger protein 1-like	Un
104			Callorhinchus milii	ELEPHANT SHARK	XP_007893189.1	103179622	znf683		zinc finger protein 683	zinc finger protein 683|PR domain zinc finger protein 1	Un	NW_006890089.1	3025285	3040865	plus	6
105			Latimeria chalumnae	COELACANTH	XP_005993993.1	102359405	ZNF683		zinc finger protein 683	zinc finger protein 683	Un
106			Erpetoichthys calabaricus	REEDFISH	XP_028674508.1	114664529	LOC114664529		PR domain zinc finger protein 1-like	PR domain zinc finger protein 1-like	14	NC_041407.1	38533293	38583093	minus	7
107			Lepisosteus oculatus	SPOTTED GAR	XP_006631500.2	102689055	LOC102689055		PR domain zinc finger protein 1-like	PR domain zinc finger protein 1-like	LG6	NC_023184.1	9265795	9296618	plus	8
108			Ictalurus punctatus	CHANNEL CATFISH	XP_017316469.1	108260590	LOC108260590		PR domain zinc finger protein 1-like	PR domain zinc finger protein 1-like	2	NC_030417.1	18931445	18944474	minus	8
109			Danio rerio	ZEBRAFISH	XP_021323870.1	110437762	prdm1b		PR domain containing 1b, with ZNF domain	PR domain zinc finger protein 1-like|PR domain containing 1b	19	NC_007130.7	48160384	48186103	plus	6
110			Scleropages formosus	ASIAN BONYTONGUE	XP_018603413.1	108931851	LOC108931851		PR domain zinc finger protein 1-like	PR domain zinc finger protein 1-like	23	NC_041828.1	1216390	1224755	minus	7
111			Paramormyrops kingsleyae	PARAMORMYROPS KINGSLEYAE	XP_023687736.1	111854214	LOC111854214		PR domain zinc finger protein 1-like	PR domain zinc finger protein 1-like	Un
112			Oryzias latipes	JAPANESE MEDAKA	XP_004074375.1	101170604	LOC101170604		PR domain zinc finger protein 1	PR domain zinc finger protein 1	11	NC_019869.2	20514158	20521835	minus	8
113			Poecilia mexicana	POECILIA MEXICANA	XP_014851418.1	106923072	LOC106923072		PR domain zinc finger protein 1-like	PR domain zinc finger protein 1-like	Un
114			Oreochromis niloticus	NILE TILAPIA	XP_025758028.1	100700828	LOC100700828		PR domain zinc finger protein 1	PR domain zinc finger protein 1	LG22	NC_031985.2	14549202	14559873	plus	7
115			Larimichthys crocea	LARGE YELLOW CROAKER	XP_010741035.1	104928444	LOC104928444	EH28_17690	PR domain zinc finger protein 1	PR domain zinc finger protein 1	XIII	NC_040023.1	43035048	43047192	plus	8
116			Seriola lalandi dorsalis	KINGFISH	XP_023284783.1	111671809	LOC111671809		PR domain zinc finger protein 1-like	PR domain zinc finger protein 1-like	Un
117			Takifugu rubripes	FUGU	XP_029701333.1	101064775	LOC101064775		PR domain zinc finger protein 1-like	PR domain zinc finger protein 1-like	12	NC_042296.1	10193676	10203571	plus	9
118			Esox lucius	NORTHERN PIKE	XP_019905918.1	105008788	LOC105008788		PR domain zinc finger protein 1	PR domain zinc finger protein 1	LG10	NC_025977.4	23238334	23251654	plus	8
119		blimp1b-1	Salvelinus alpinus	ARCTIC CHAR	XP_023831323.1	111955343	LOC111955343		PR domain zinc finger protein 1	PR domain zinc finger protein 1	LG30	NC_036869.1	21371400	21385343	plus	8
120			Oncorhynchus mykiss	RAINBOW TROUT	GSONMG00047229001	110516101	LOC110516101		PR domain zinc finger protein 1-like	PR domain zinc finger protein 1-like	Un
121			Salmo salar	ATLANTIC SALMON	XP_013997445.1	106570043	LOC106570043		PR domain zinc finger protein 1-like	PR domain zinc finger protein 1-like	ssa14	NC_027313.1	56156705	56170808	minus	8
122			Salmo trutta	RIVER TROUT	XP_029591554.1	115175983	LOC115175983		PR domain zinc finger protein 1-like	PR domain zinc finger protein 1-like	36	NC_042992.1	35822225	35828480	plus	5
123		blimp1b-2	Oncorhynchus mykiss	RAINBOW TROUT	XP_021427504.1	110496128	LOC110496128		PR domain zinc finger protein 1-like	PR domain zinc finger protein 1-like	18	NC_035094.1	30234061	30247025	minus	8
124			Salvelinus alpinus	ARCTIC CHAR	XP_023832067.1	111955917	LOC111955917		PR domain zinc finger protein 1	PR domain zinc finger protein 1	LG31	NC_036870.1	6973792	6980669	minus	6
125			Salmo salar	ATLANTIC SALMON	XP_014033057.1	106588492	LOC106588492		PR domain zinc finger protein 1-like	PR domain zinc finger protein 1-like	ssa27	NC_027326.1	6947805	6960875	minus	8
126			Salmo trutta	RIVER TROUT	XP_029587352.1	115173435	LOC115173435		PR domain zinc finger protein 1-like	PR domain zinc finger protein 1-like	34	NC_042990.1	7481308	7494621	minus	8
127			Branchiostoma belcheri	BELCHER'S LANCELET	XP_019639157.1	109481115	LOC109481115		PR domain zinc finger protein 1-like	PR domain zinc finger protein 1-like	Un
128			Branchiostoma floridae	FLORIDA LANCELET	XP_002604255.1	7228247	BRAFLDRAFT_120365	BRAFLDRAFT_120365	hypothetical protein
